# Supplementary material for: Phenolic Thiazoles with Antioxidant and Antiradical Activity. Synthesis, In Vitro Evaluation, Toxicity, Electrochemical Behavior, Quantum Studies and Antimicrobial Screening
Source: MDPI journal article supplement (doi:10.3390/antiox10111707), 2021-10-27
Supplement: s1 [file s1]

# Phenolic Thiazoles with Antioxidant and Antiradical Activity. Synthesis, In Vitro Evaluation, Toxicity, Electrochemical Behavior, Quantum Studies and Antimicrobial Screening

Gabriel Marc <sup>1</sup>, Anca Stana <sup>1,\*</sup>, Ana Horiana Franchini <sup>1</sup>, Dan Cristian Vodnar <sup>2,\*</sup>, Gabriel Barta <sup>2</sup>, Mihaela Tertiş <sup>3</sup>, Iulia Şanta <sup>3</sup>, Cecilia Cristea <sup>3</sup>, Adrian Pîrnău <sup>4</sup>, Alexandra Ciorîţă <sup>4,5</sup>, Bogdan Dume <sup>5</sup>, Vlad-Alexandru Toma <sup>4,5,6</sup>, Laurian Vlase <sup>7</sup>, Iliaara Oniga <sup>8</sup> and Ovidiu Oniga <sup>1</sup>

<sup>1</sup> Department of Pharmaceutical Chemistry, "Iuliu Haţieganu" University of Medicine and Pharmacy, 41 Victor Babeş Street, RO-400012 Cluj-Napoca, Romania; [marc.gabriel@umfcluj.ro](mailto:marc.gabriel@umfcluj.ro) (G.M.); [ana.ho.franchini@elearn.umfcluj.ro](mailto:ana.ho.franchini@elearn.umfcluj.ro) (A.H.F.); [ooniga@umfcluj.ro](mailto:ooniga@umfcluj.ro) (O.O.)

<sup>2</sup> Department of Food Science and Technology, University of Agricultural Sciences and Veterinary Medicine, 3-5 Manăştur Street, RO-400372 Cluj-Napoca, Romania; [gabriel.barta@usamvcluj.ro](mailto:gabriel.barta@usamvcluj.ro)

<sup>3</sup> Department of Analytical Chemistry, Faculty of Pharmacy, "Iuliu Haţieganu" University of Medicine and Pharmacy, 4 Louis Pasteur Street, RO-400349 Cluj-Napoca, Romania; [mihaela.tertis@umfcluj.ro](mailto:mihaela.tertis@umfcluj.ro) (M.T.); [iulia.nico.santa@elearn.umfcluj.ro](mailto:iulia.nico.santa@elearn.umfcluj.ro) (I.Ş.); [ccristea@umfcluj.ro](mailto:ccristea@umfcluj.ro) (C.C.)

<sup>4</sup> National Institute for Research and Development of Isotopic and Molecular Technologies, 67-103 Donath Street, RO-400293 Cluj-Napoca, Romania; [apirnaui@itim-cj.ro](mailto:apirnaui@itim-cj.ro) (A.P.); [alexandra.ciorita@itim-cj.ro](mailto:alexandra.ciorita@itim-cj.ro) (A.C.); [vlad.toma@ubbcluj.ro](mailto:vlad.toma@ubbcluj.ro) (V.-A.T.)

<sup>5</sup> Department of Molecular Biology and Biotechnologies, Babeş-Bolyai University, 4-6 Clinicilor Street, RO-400006 Cluj-Napoca, Romania; [bogdan.dume@stud.ubbcluj.ro](mailto:bogdan.dume@stud.ubbcluj.ro)

<sup>6</sup> NIRDBS Bucharest, Institute of Biological Research, 48 Republicii Street, RO-400015 Cluj-Napoca, Romania

<sup>7</sup> Department of Pharmaceutical Technology and Biopharmaceutics, "Iuliu Haţieganu" University of Medicine and Pharmacy, 41 Victor Babeş Street, RO-400012 Cluj-Napoca, Romania; [laurian.vlase@umfcluj.ro](mailto:laurian.vlase@umfcluj.ro)

<sup>8</sup> Department of Pharmacognosy, "Iuliu Haţieganu" University of Medicine and Pharmacy, 12 Ion Creangă Street, RO-400010 Cluj-Napoca, Romania; [ioniga@umfcluj.ro](mailto:ioniga@umfcluj.ro)

\* Correspondence: [stana.anca@umfcluj.ro](mailto:stana.anca@umfcluj.ro) (A.S.); [dan.vodnar@usamvcluj.ro](mailto:dan.vodnar@usamvcluj.ro) (D.C.V.); Tel.: +40-264-450-529 (A.S.); +40-747-341-881 (D.C.V.)

## Theoretical Quantum Studies

Table S1. HOMO and LUMO depicted for the compounds 5a-b, 6a-b and 8a-b.

| Compound<br>d | HOMO                                                                                | LUMO                                                                                 |
|---------------|-------------------------------------------------------------------------------------|--------------------------------------------------------------------------------------|
| 5a            | 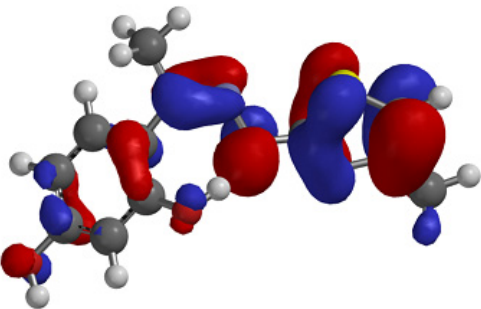 |  |
| 5b            |  |  |

---

6a

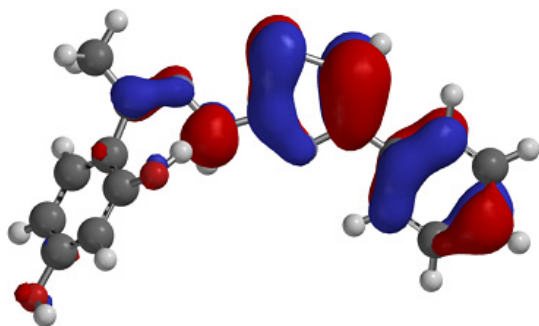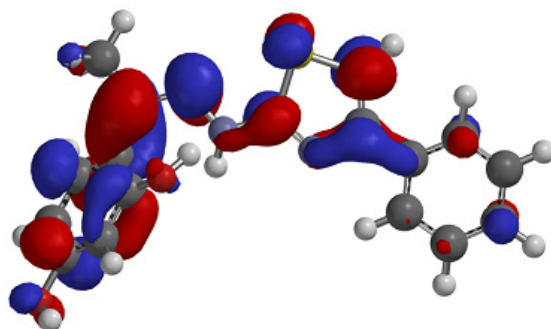

---

6b

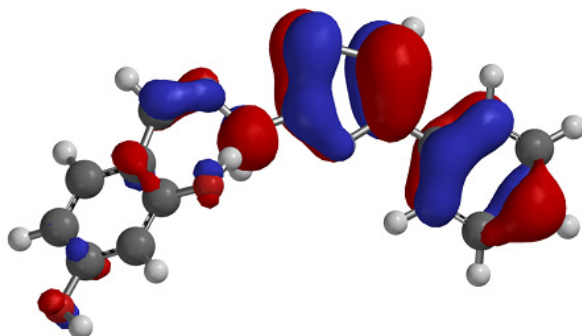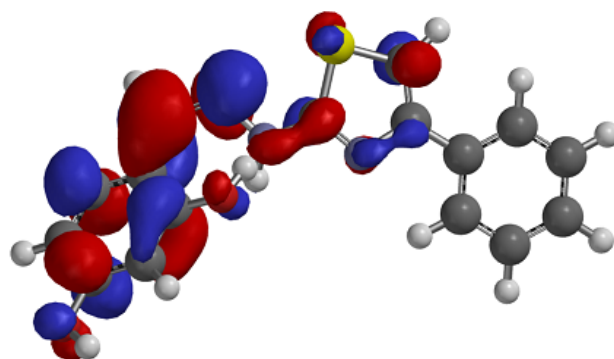

---

7a

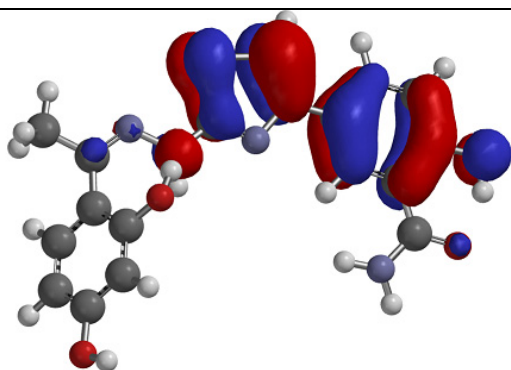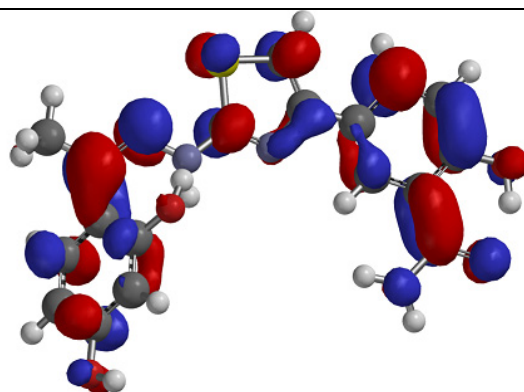

---

7b

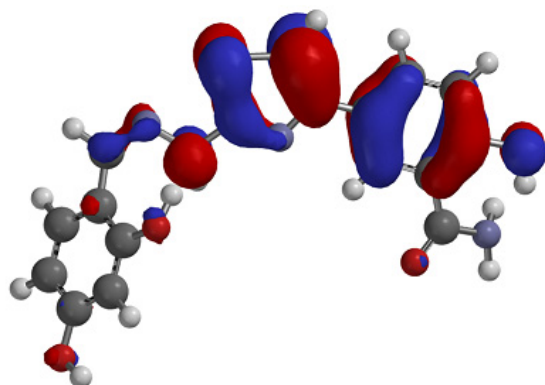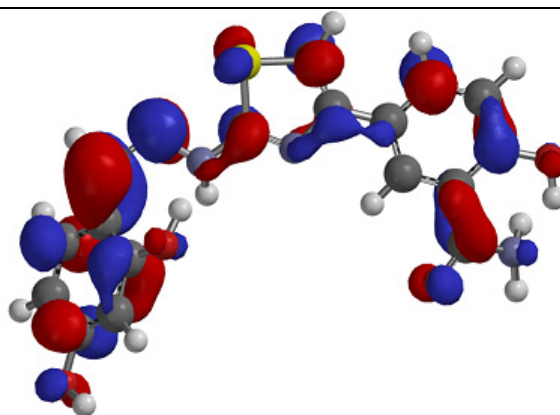

8a

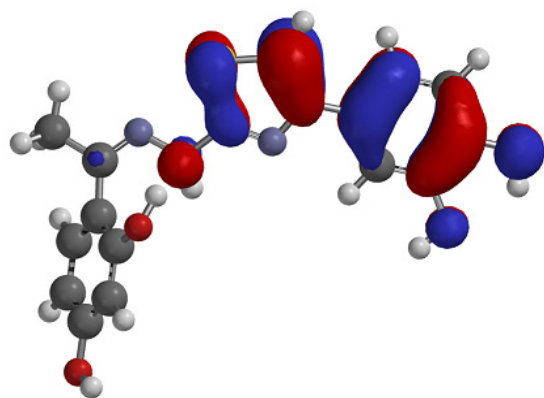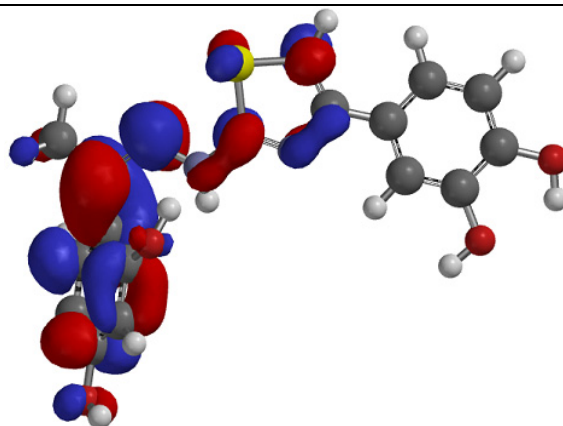

8b

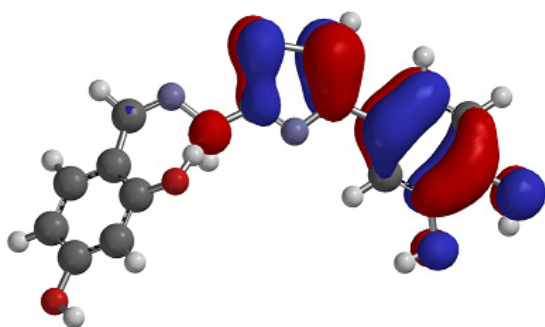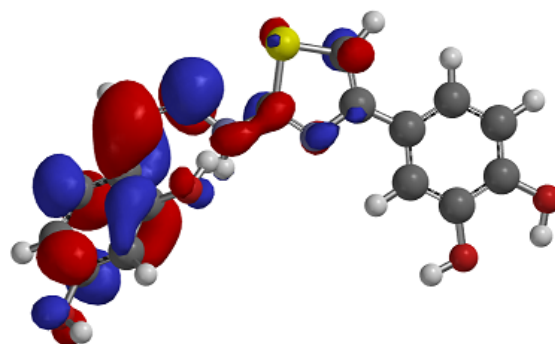

Spectral data for the compounds 5b, 6a-b, 7a-b and 8a-b

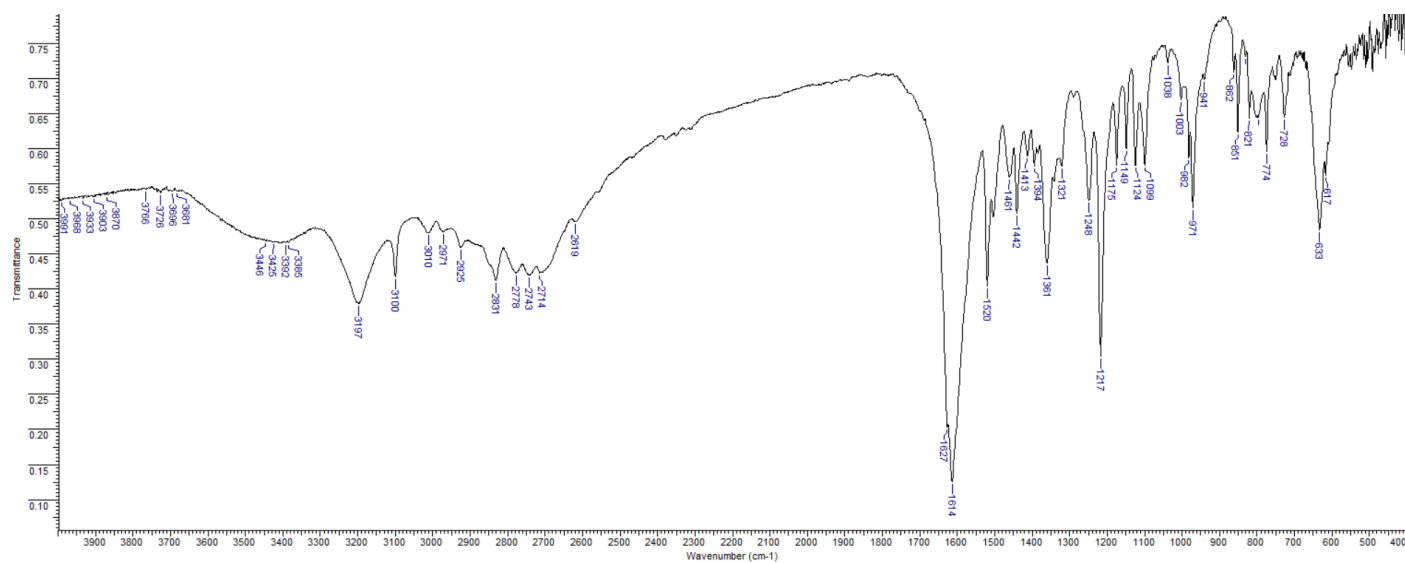

Figure S1. FTIR spectrum of compound 5b.

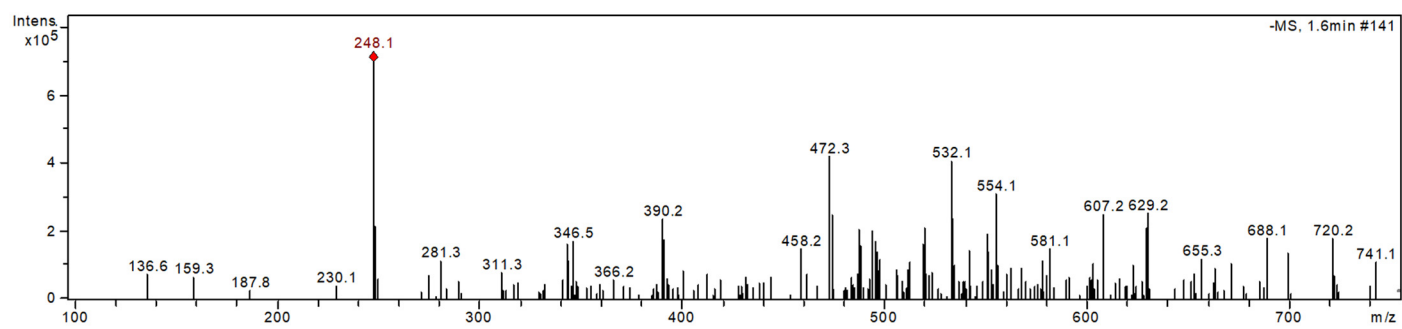

Figure S2. MS spectrum of compound 5b.

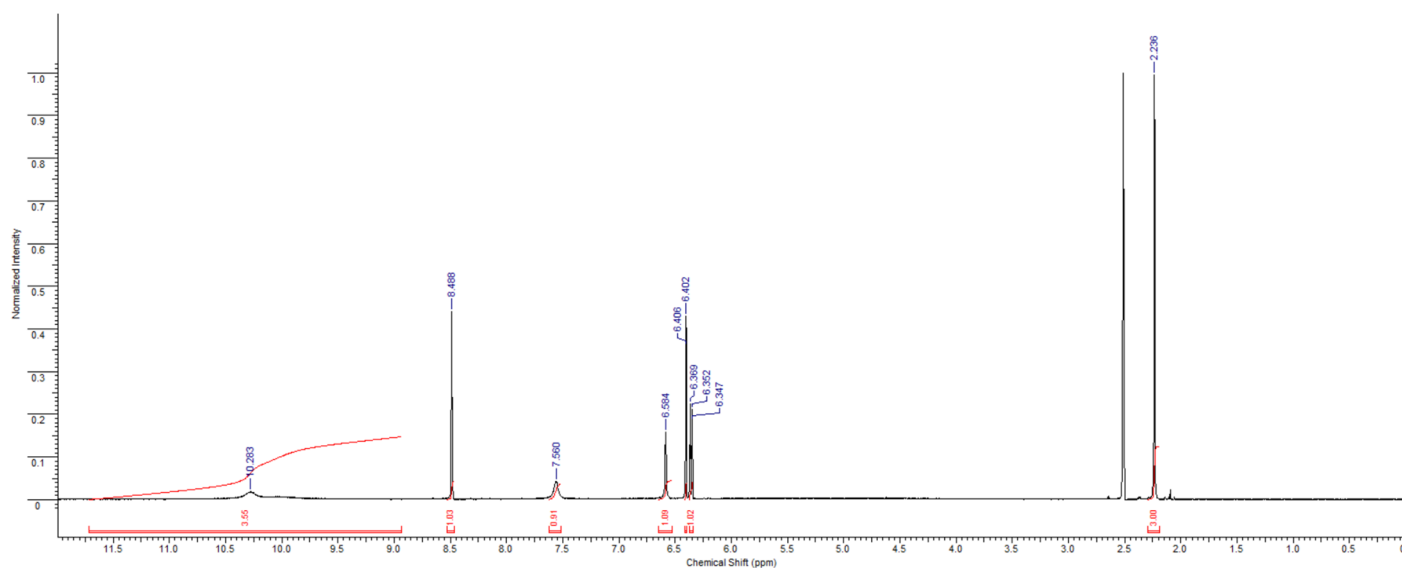

Figure S3. <sup>1</sup>H-NMR spectrum of compound 5b.

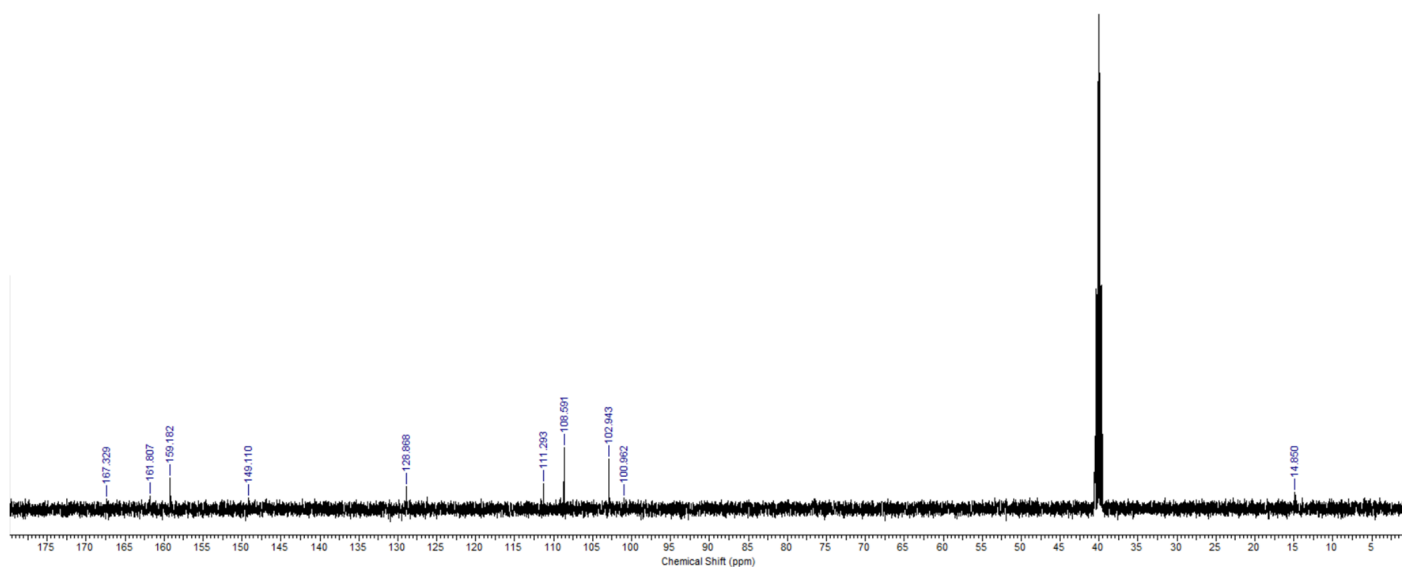

Figure S4. <sup>13</sup>C-NMR spectrum of compound 5b.

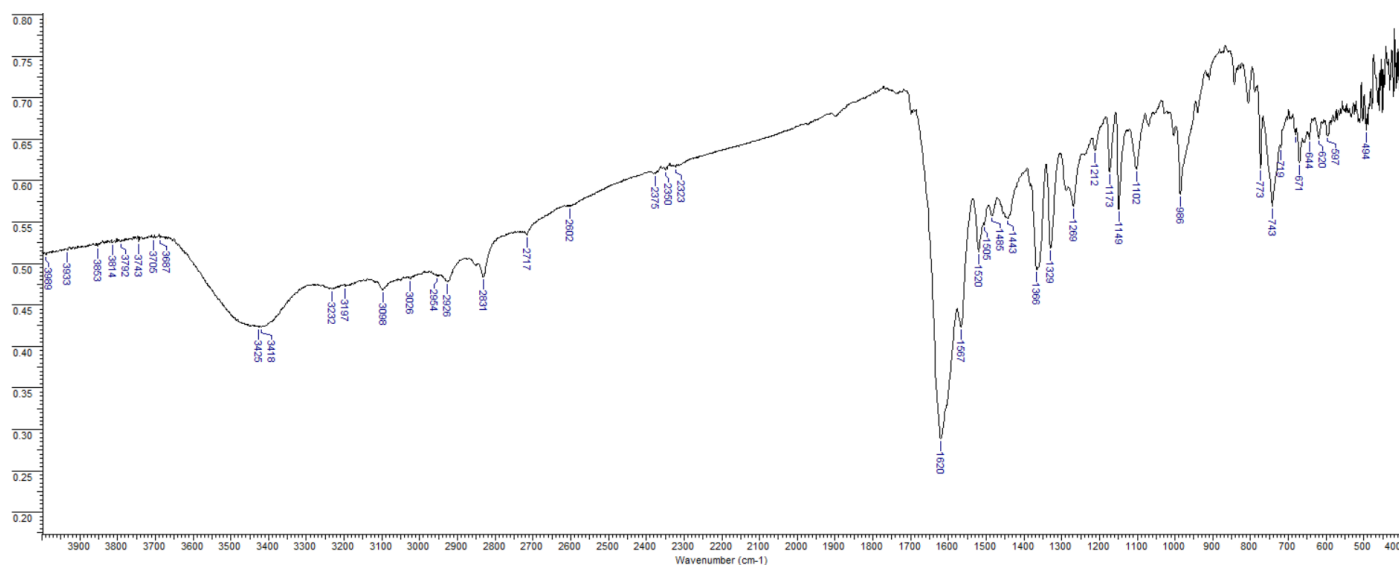

**Figure S5.** FTIR spectrum of compound **6a**.

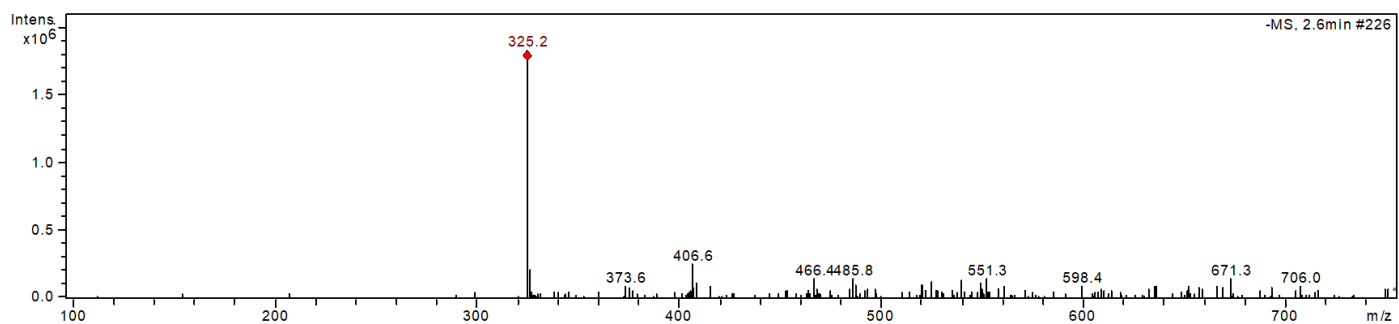

**Figure S6.** MS spectrum of compound **6a**.

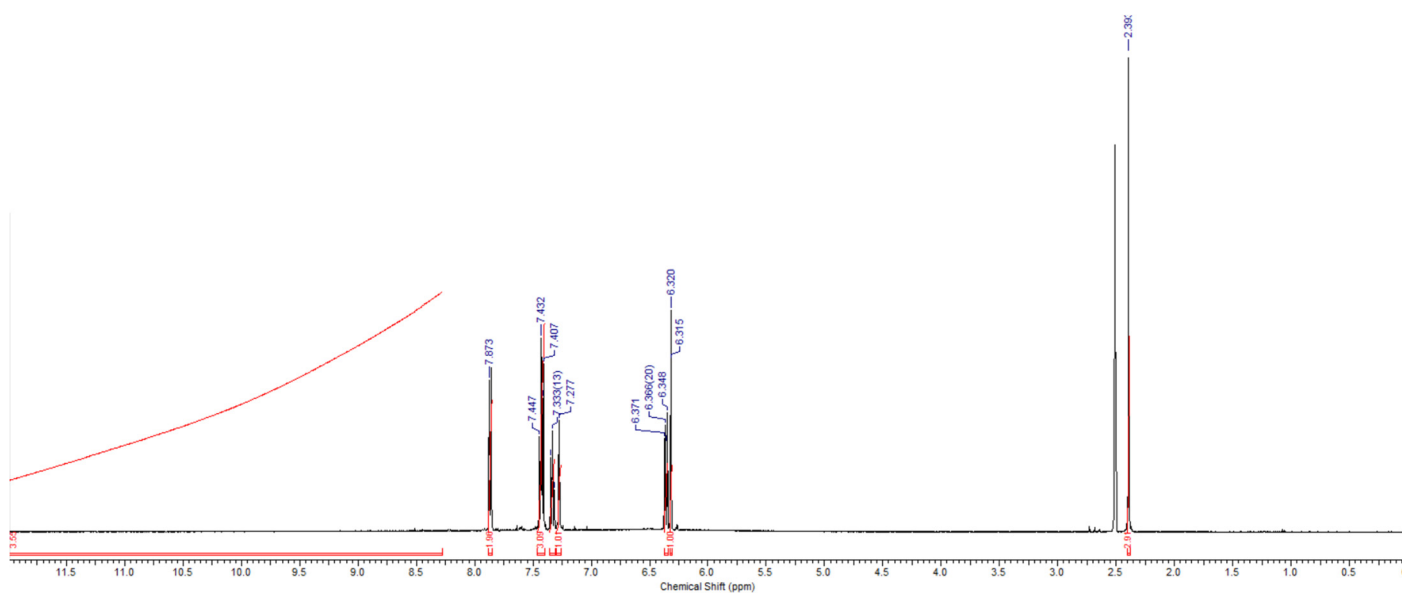

**Figure S7.**  $^1\text{H}$ -NMR spectrum of compound **6a**.

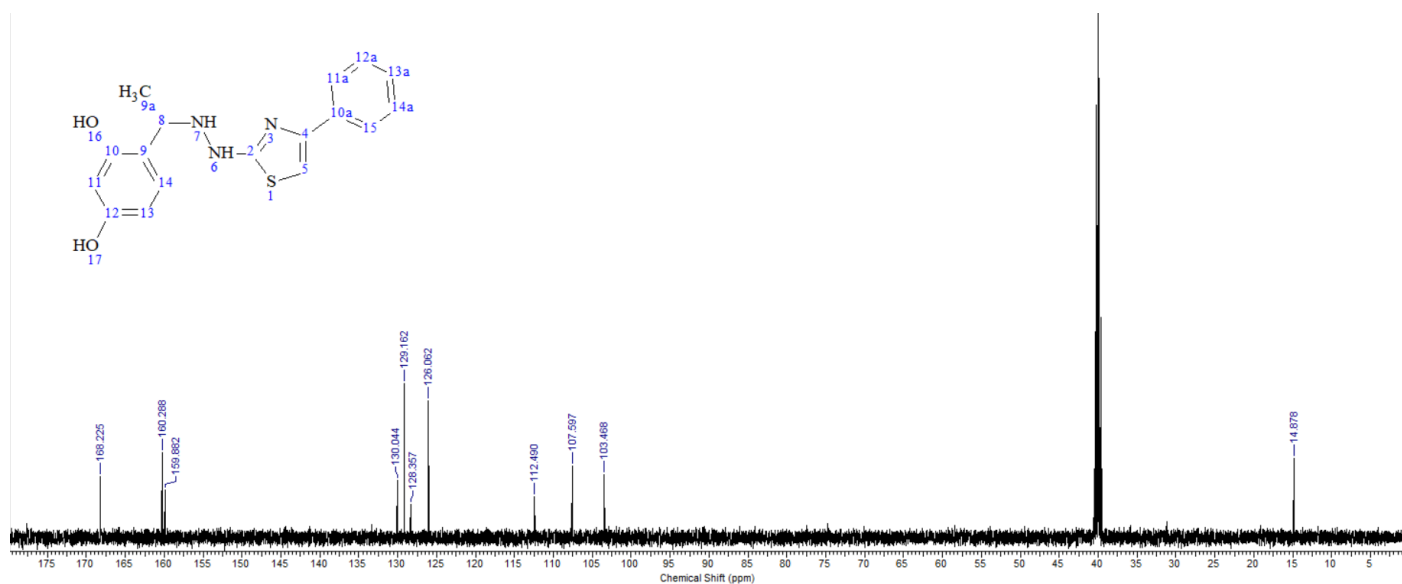

Figure S8.  $^{13}\text{C}$ -NMR spectrum of compound 6a.

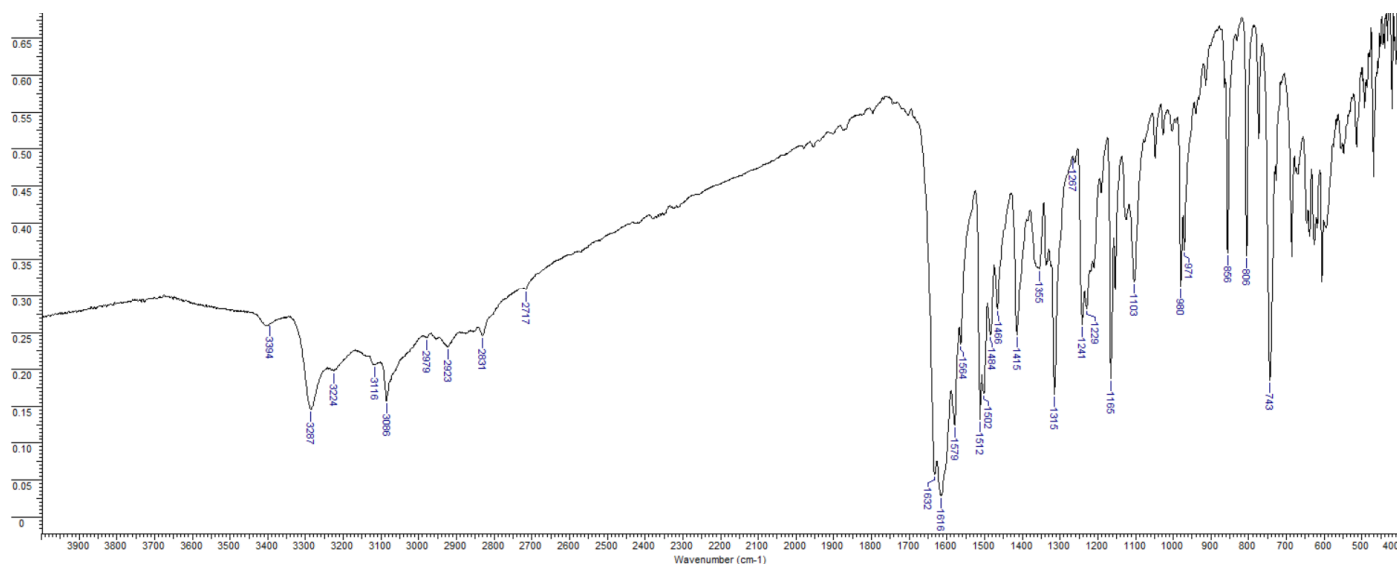

Figure S9. FTIR spectrum of compound 6b.

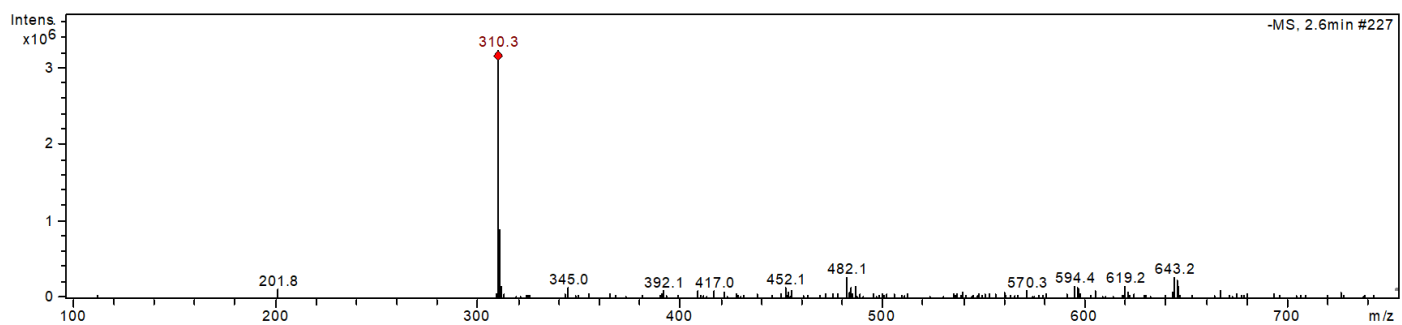

Figure S10. MS spectrum of compound 6b.

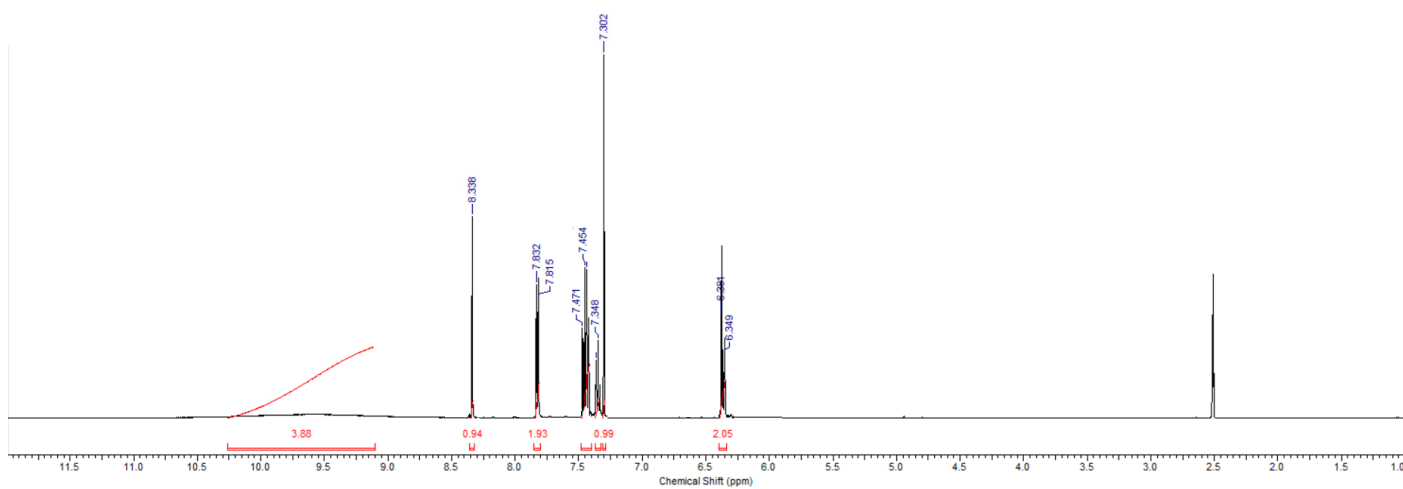

Figure S11. <sup>1</sup>H-NMR spectrum of compound **6b**.

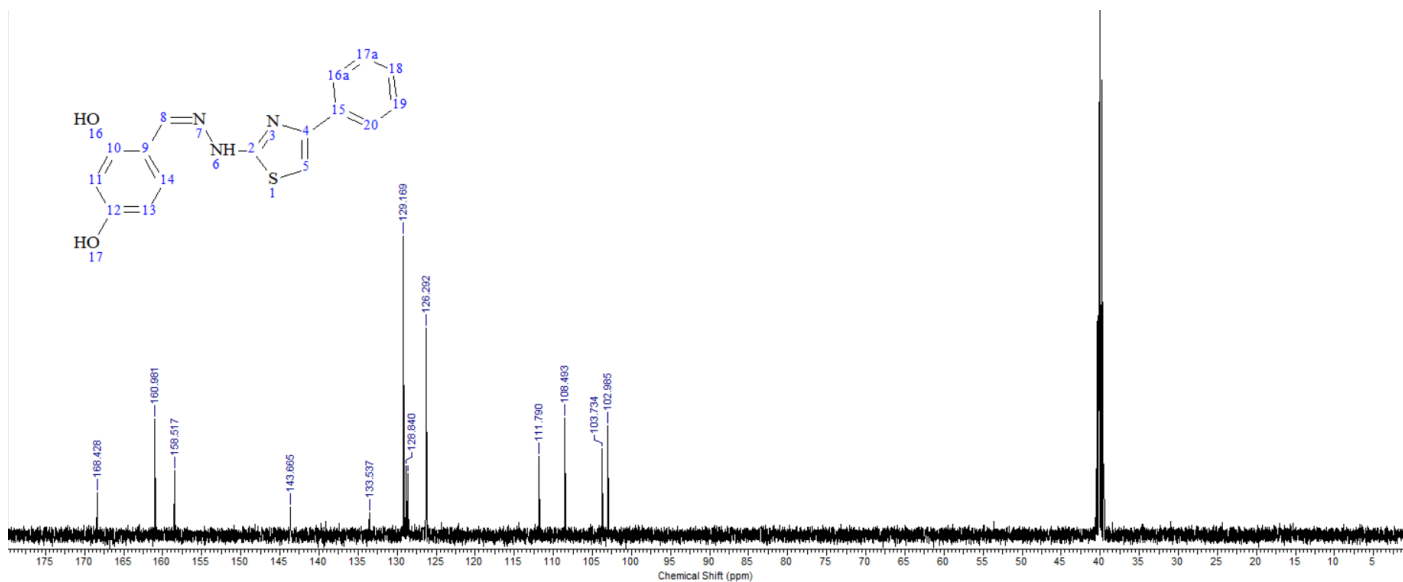

Figure S12. <sup>13</sup>C-NMR spectrum of compound **6b**.

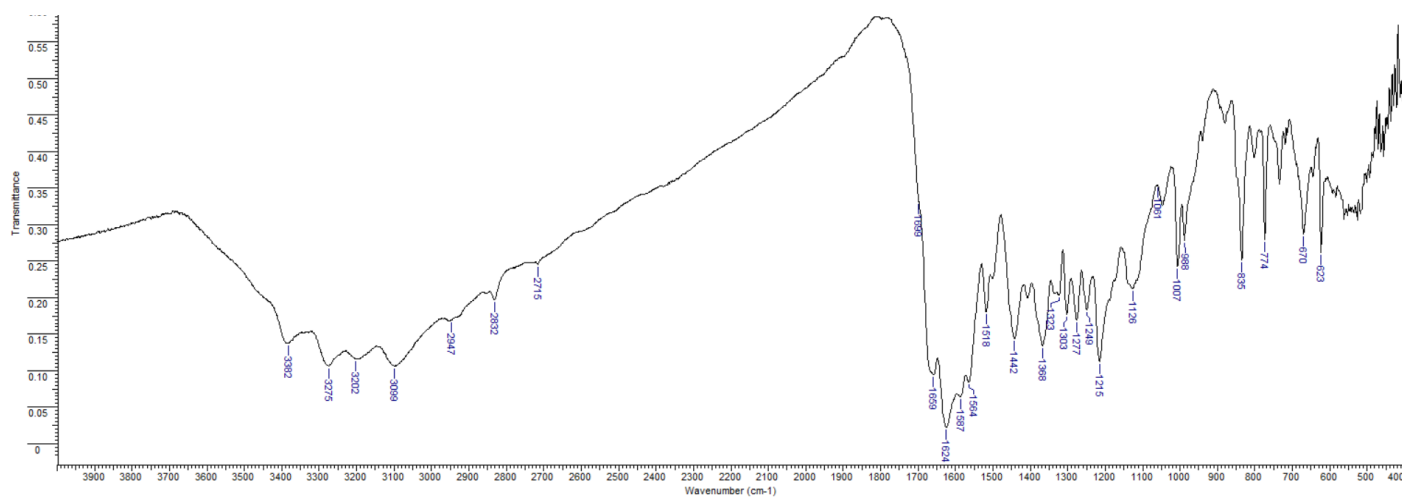

Figure S13. FTIR spectrum of compound 7a.

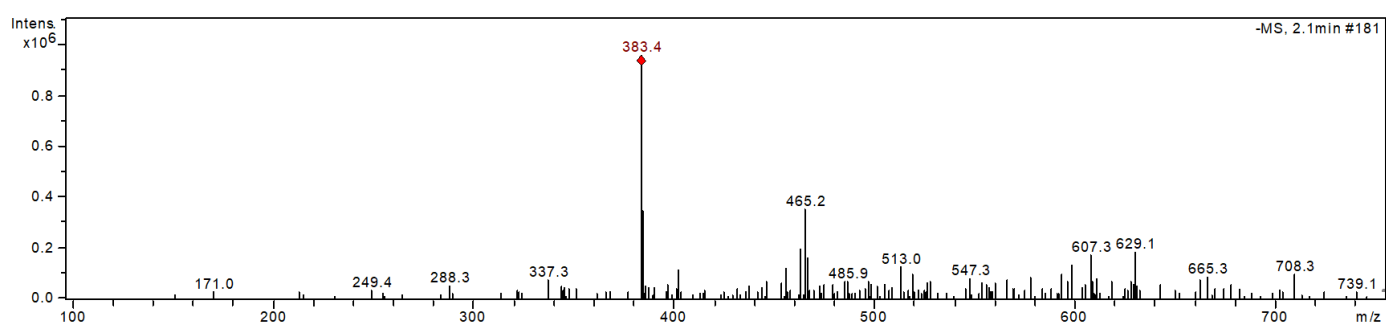

Figure S14. MS spectrum of compound 7a.

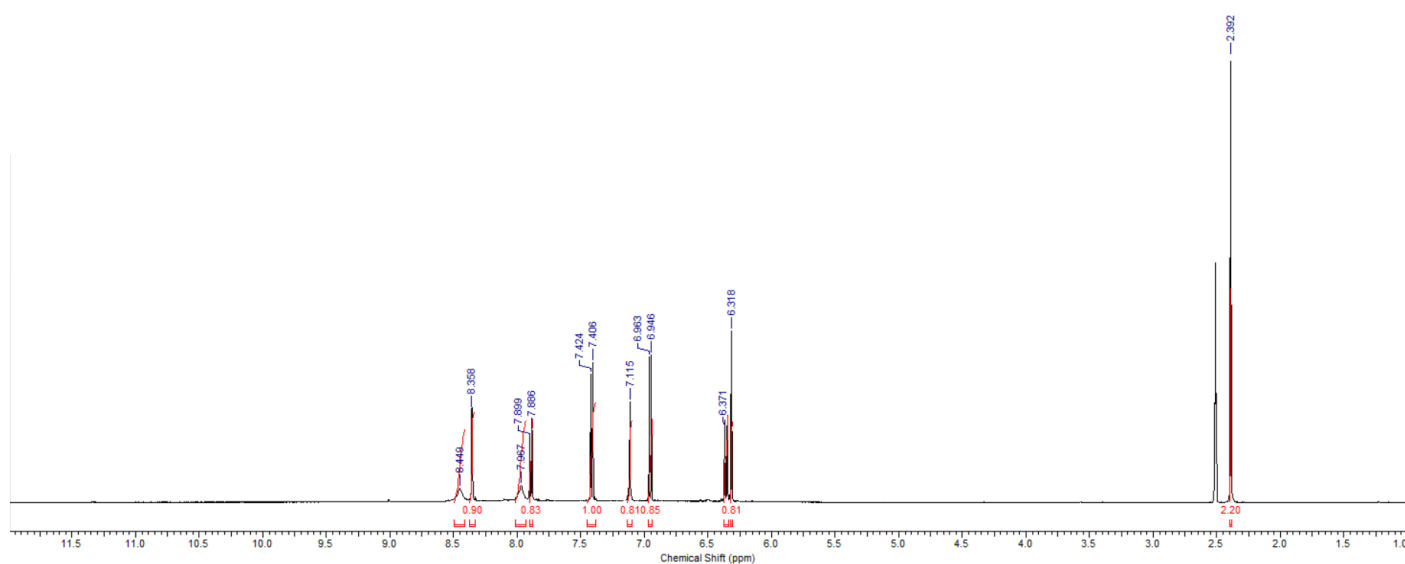

Figure S15. <sup>1</sup>H-NMR spectrum of compound 7a.



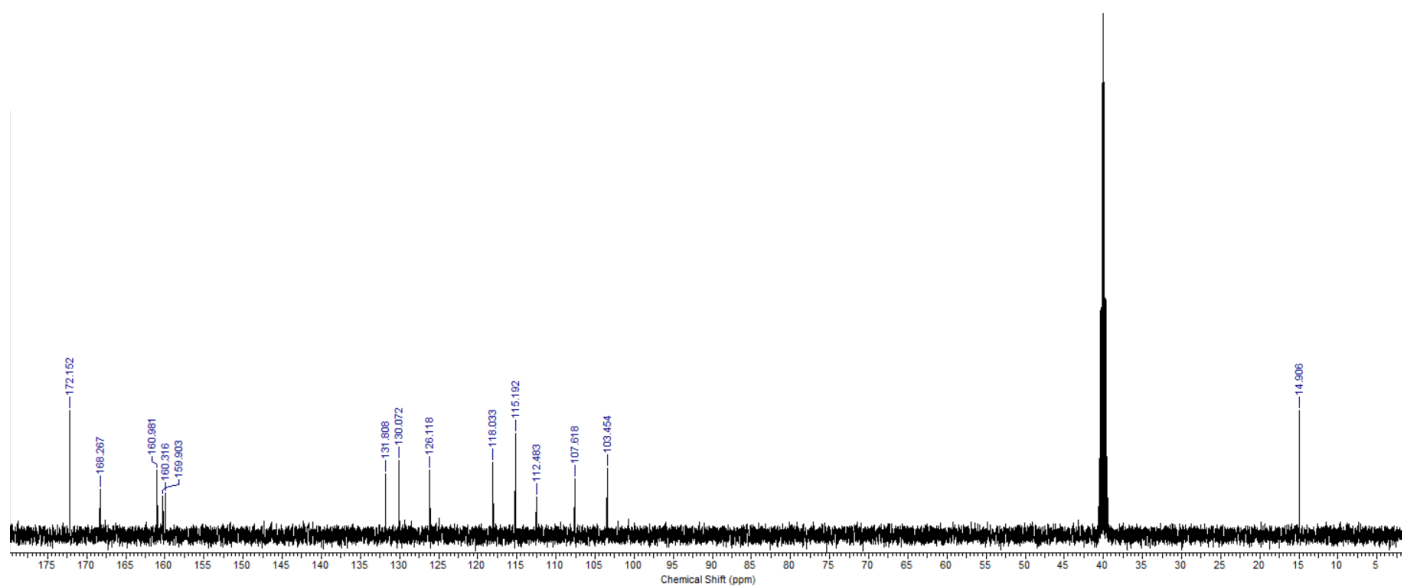

Figure S16.  $^{13}\text{C}$ -NMR spectrum of compound **7a**.

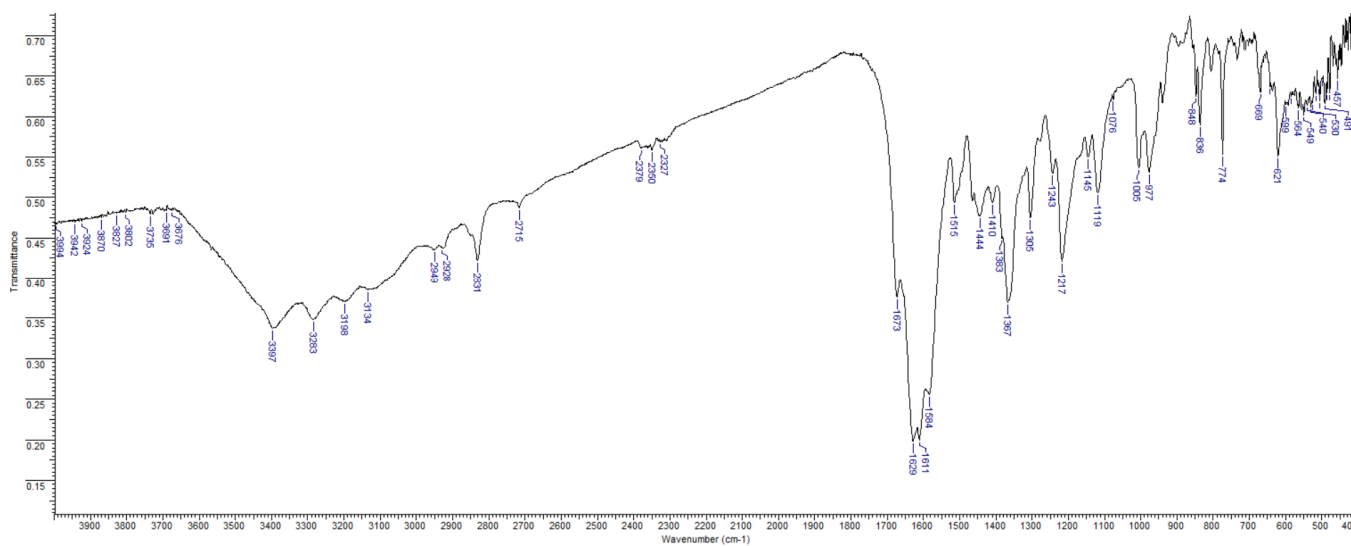

Figure S17. FTIR spectrum of compound **7b**.

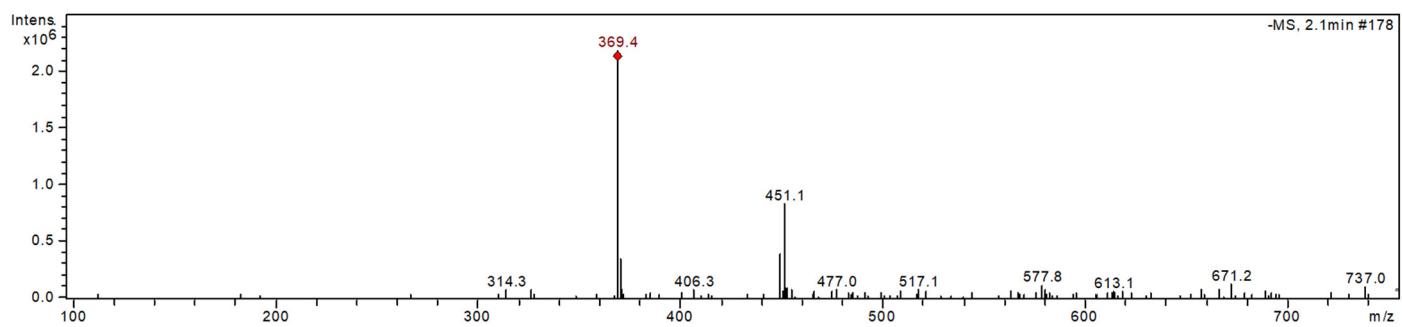

Figure S18. MS spectrum of compound **7b**.

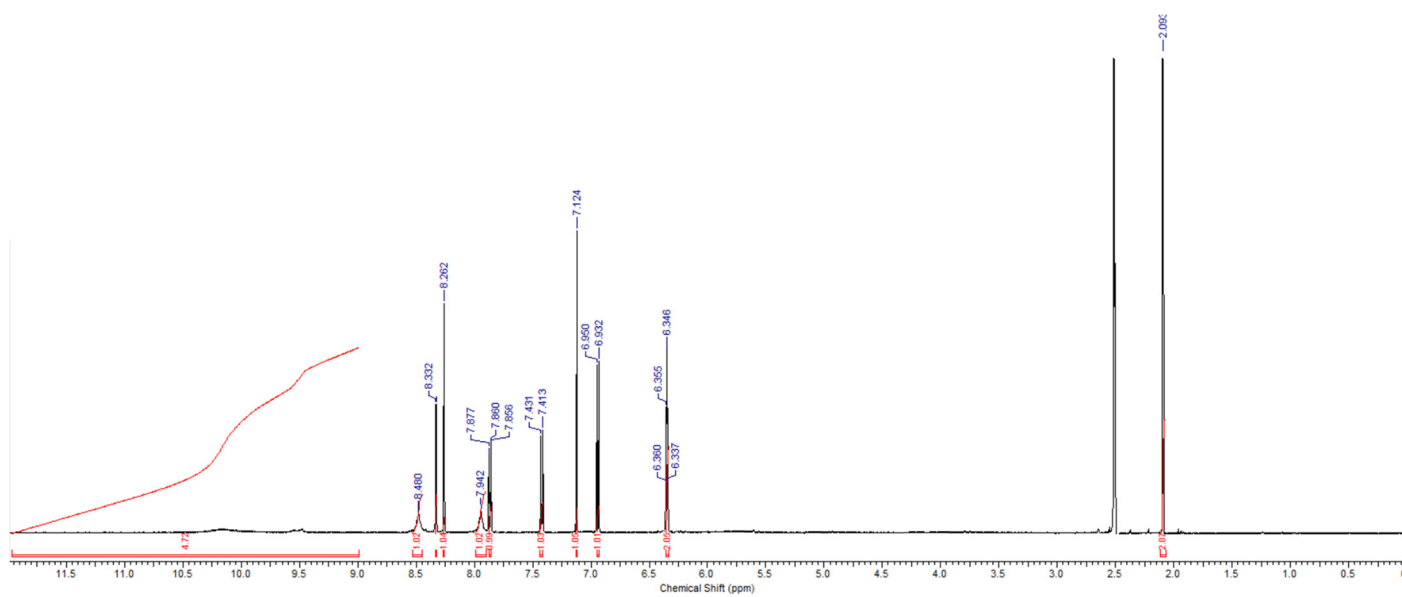

Figure S19. <sup>1</sup>H-NMR spectrum of compound **7b**.

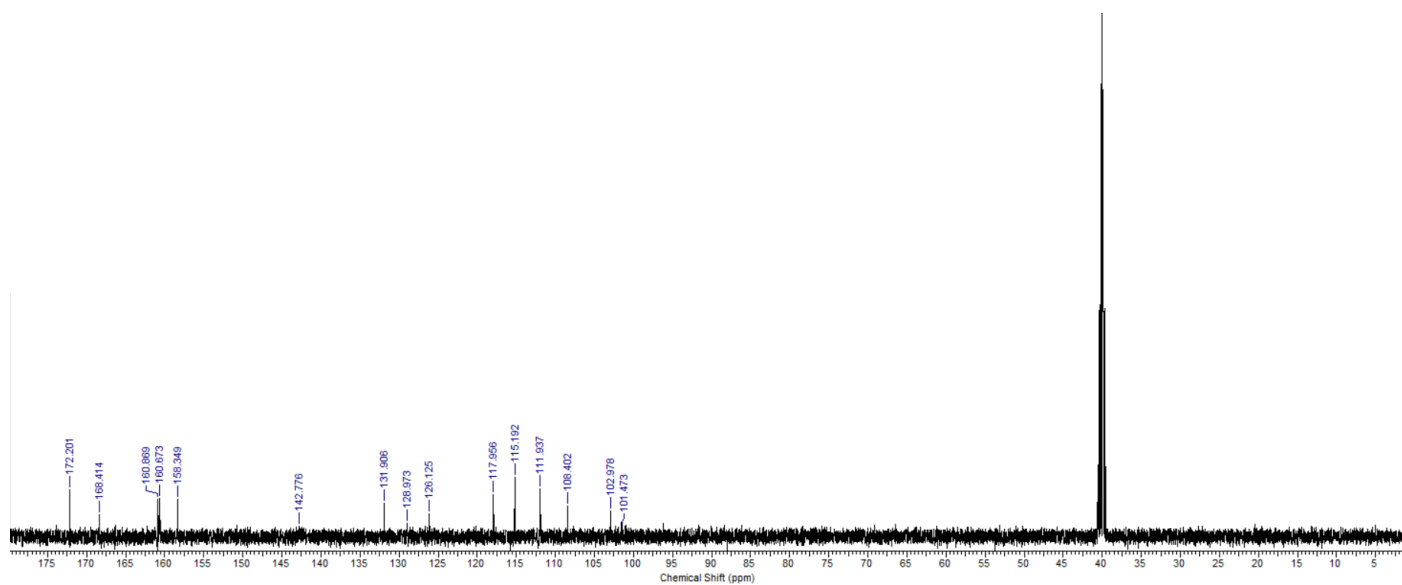

Figure S20. <sup>13</sup>C-NMR spectrum of compound **7b**.

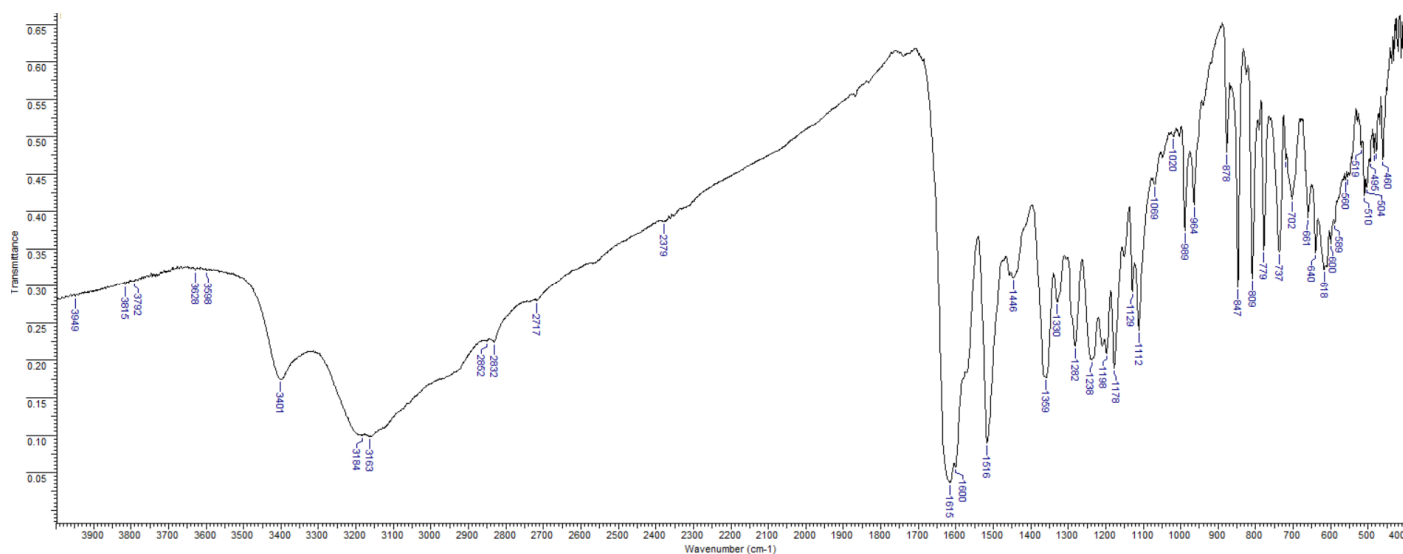

Figure S21. FTIR spectrum of compound 8a.

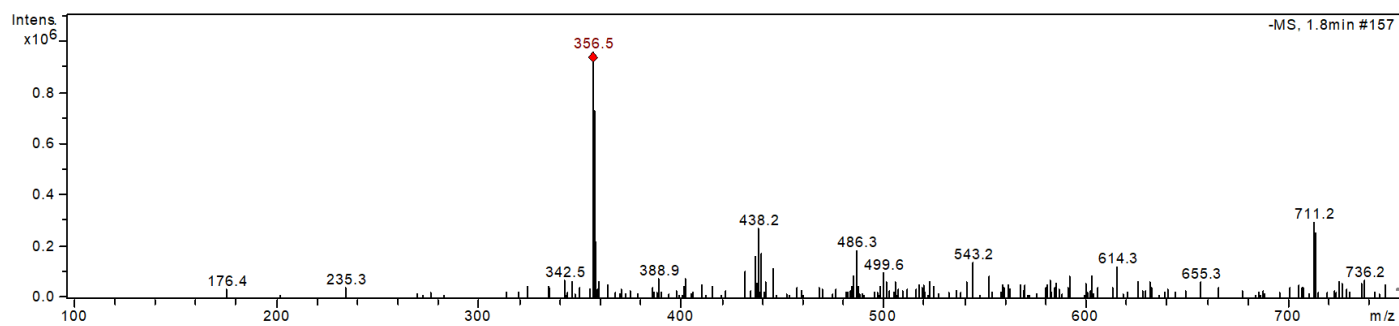

Figure S22. MS spectrum of compound 8a.

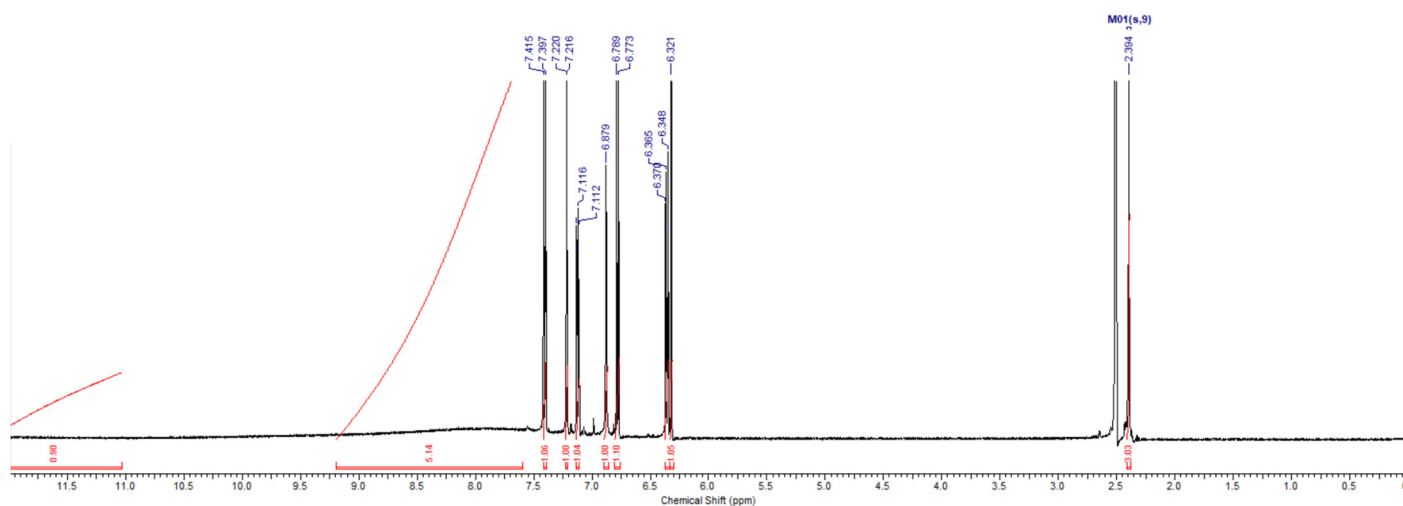

Figure S23. <sup>1</sup>H-NMR spectrum of compound 8a.

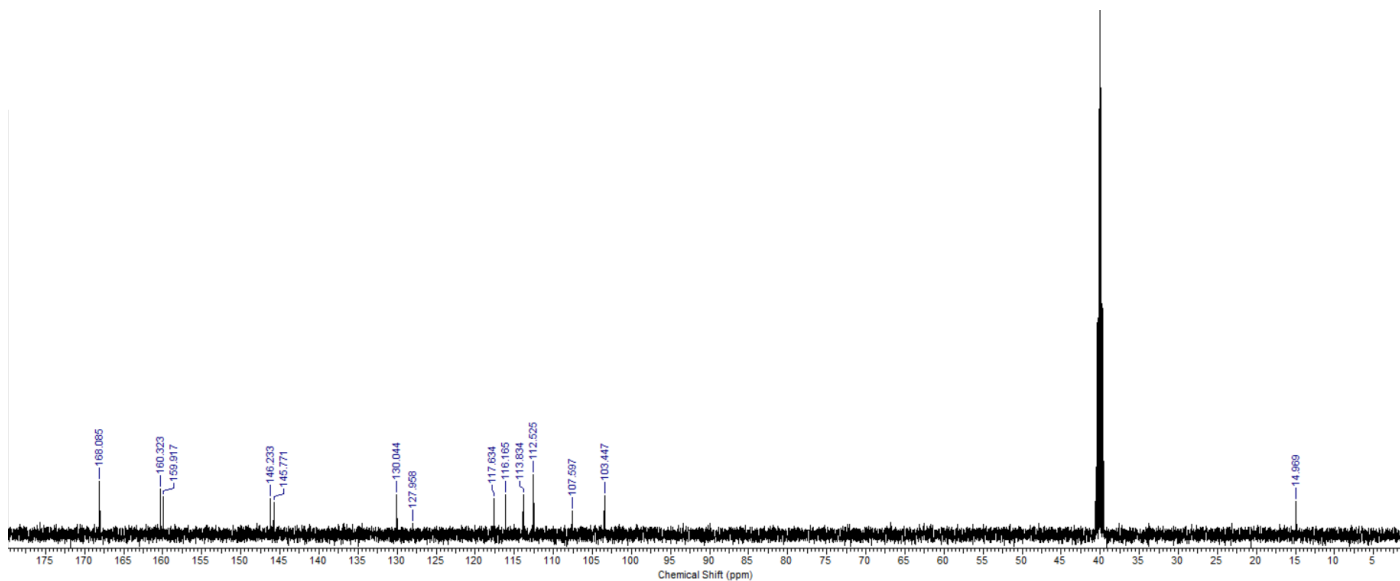

Figure S24. <sup>13</sup>C-NMR spectrum of compound 8a.

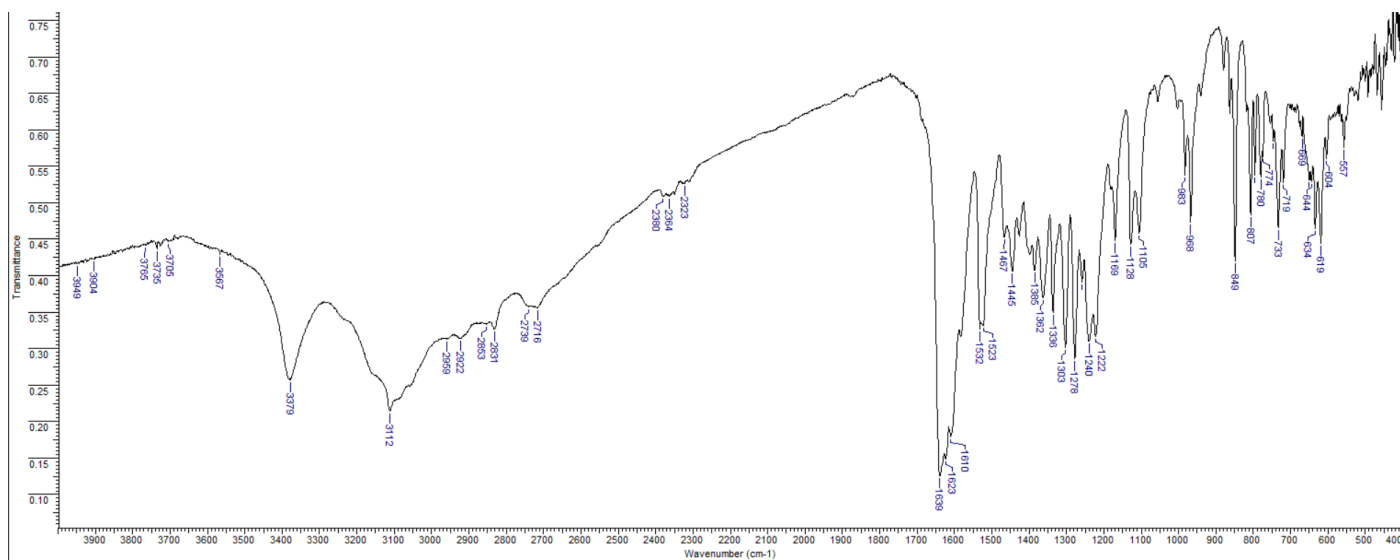

Figure S25. FTIR spectrum of compound 8b.

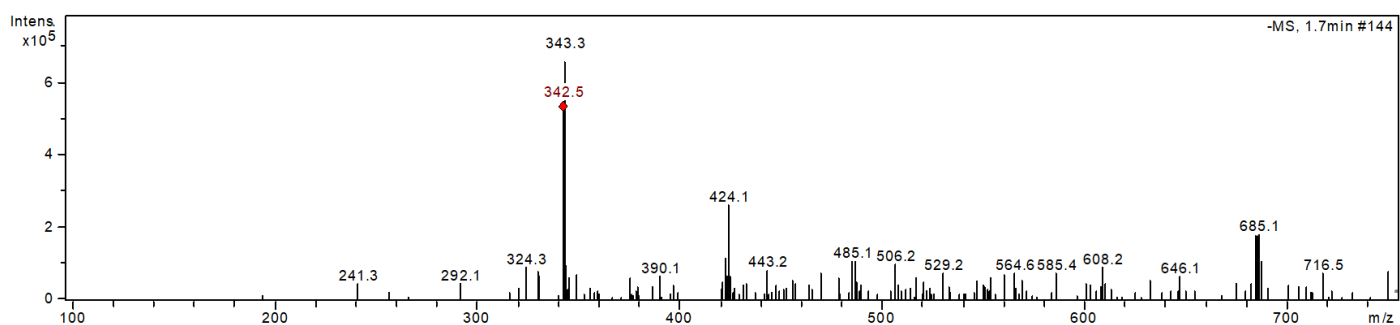

Figure S26. MS spectrum of compound 8b.

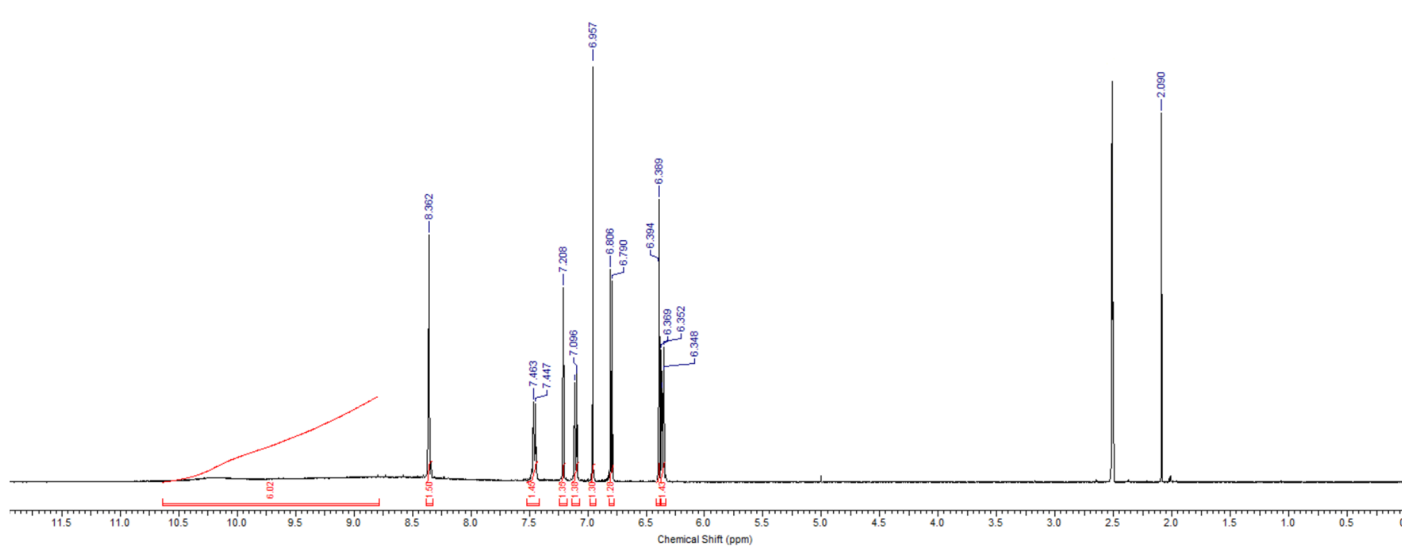

Figure S27. <sup>1</sup>H-NMR spectrum of compound **8b**.

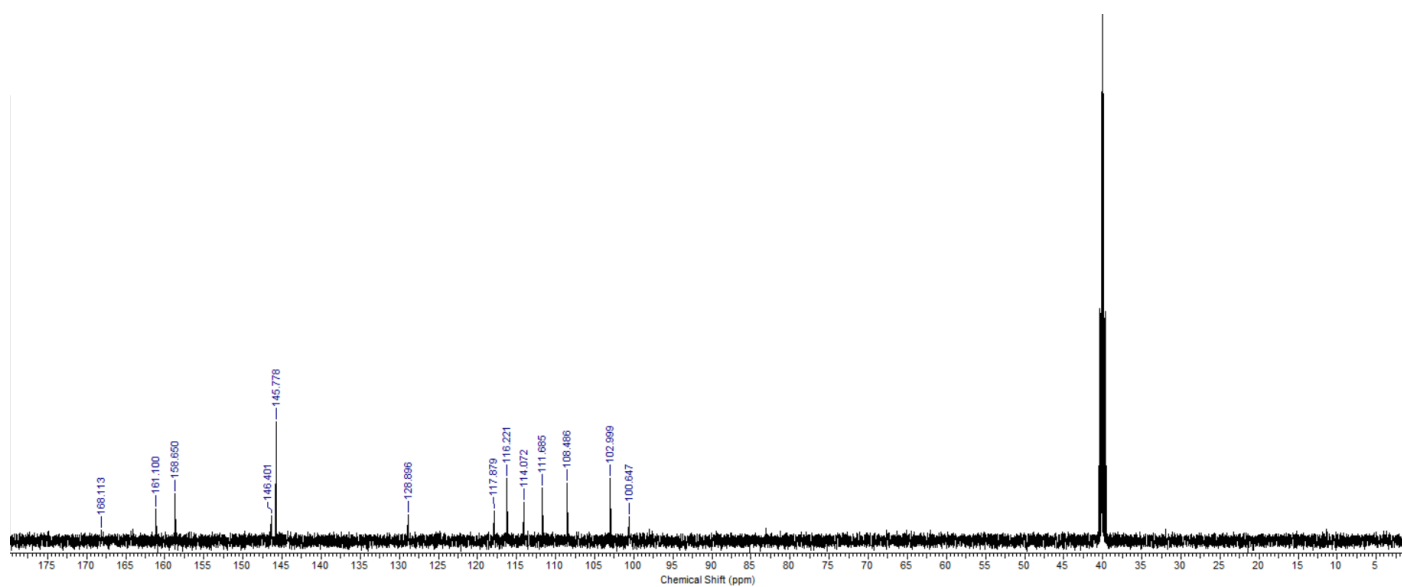

Figure S28. <sup>13</sup>C-NMR spectrum of compound **8b**.
